# Supplementary material for: Maternal Gestational Diabetes Mellitus, Type 1 Diabetes, and Type 2 Diabetes During Pregnancy and Risk of ADHD in Offspring
Source: Oxford University Press journal article supplement (doi:10.2337/dc18-0733), 2018-10-29
Supplement: dc180733supplementarydata.pdf [file dc180733supplementarydata.pdf]

# SUPPLEMENTARY DATA

**Supplementary Table 1.** Associations between maternal diabetes and risk of attention-deficit hyperactivity disorder (ADHD) in offspring

|                                                                                      | Adjusting for<br>smoking, alcohol and<br>pre-pregnancy BMI* |         | Adjusting for<br>preeclampsia/eclampsia,<br>congenital anomalies, birth weight<br>and gestational age at delivery * |         |
|--------------------------------------------------------------------------------------|-------------------------------------------------------------|---------|---------------------------------------------------------------------------------------------------------------------|---------|
| Maternal diabetes                                                                    | HR (95% CI)                                                 | P value | HR (95% CI)                                                                                                         | P value |
| a) GDM overall as one group                                                          |                                                             |         |                                                                                                                     |         |
| None                                                                                 | 1.00 (reference)                                            |         | 1.00 (reference)                                                                                                    |         |
| Pre-existing T1D                                                                     | 1.54 (1.08, 2.21)                                           | 0.02    | 1.50 (1.05, 2.15)                                                                                                   | 0.03    |
| Pre-existing T2D                                                                     | 1.35 (1.21, 1.50)                                           | <0.001  | 1.40 (1.26, 1.57)                                                                                                   | <0.001  |
| GDM                                                                                  | 1.00 (0.94, 1.06)                                           | 0.92    | 1.01 (0.95, 1.08)                                                                                                   | 0.69    |
| b) GDM was separated by whether anti-diabetic medications were used during pregnancy |                                                             |         |                                                                                                                     |         |
| None                                                                                 | 1.00 (reference)                                            |         | 1.00 (reference)                                                                                                    |         |
| Pre-existing T1D                                                                     | 1.55 (1.08, 2.22)                                           | 0.02    | 1.51 (1.05, 2.17)                                                                                                   | 0.03    |
| Pre-existing T2D                                                                     | 1.36 (1.22, 1.51)                                           | <0.001  | 1.41 (1.27, 1.57)                                                                                                   | <0.001  |
| GDM with medications                                                                 | 1.20 (1.07, 1.34)                                           | 0.001   | 1.25 (1.12, 1.39)                                                                                                   | <0.001  |
| GDM without medications                                                              | 0.92 (0.85, 0.99)                                           | 0.03    | 0.92 (0.86, 1.00)                                                                                                   | 0.04    |

\*other covariates included in the Cox regression models were random sibling effect, birth year, maternal age at delivery, parity, education, household income, maternal race/ethnicity, history of comorbidity, history of maternal ADHD, and sex of the child.

# SUPPLEMENTARY DATA

**Supplementary Table 2.** Associations between maternal diabetes and risk of attention-deficit hyperactivity disorder (ADHD) in offspring after excluding children with congenital anomalies

|                                                                                     |                        | Bivariate*        |         | Multivariate<br>adjusted† |         |
|-------------------------------------------------------------------------------------|------------------------|-------------------|---------|---------------------------|---------|
| Maternal diabetes                                                                   | No. with<br>ADHD/Total | HR (95% CI)       | P value | HR (95% CI)               | P value |
| a) GDM overall as one group                                                         |                        |                   |         |                           |         |
| None                                                                                | 14,250/273,618         | 1.00 (reference)  |         | 1.00 (reference)          |         |
| Pre-existing T1D                                                                    | 42/450                 | 1.99 (1.36, 2.92) | <0.001  | 1.59 (1.08, 2.33)         | 0.02    |
| Pre-existing T2D                                                                    | 413/6,895              | 1.34 (1.19, 1.49) | <0.001  | 1.36 (1.21, 1.53)         | <0.001  |
| GDM                                                                                 | 1,269/26,925           | 0.92 (0.87, 0.98) | 0.02    | 1.01 (0.94, 1.08)         | 0.79    |
| b) GDM was separated by whether anti-diabetic medications was used during pregnancy |                        |                   |         |                           |         |
| None                                                                                | 14,250/273,618         | 1.00 (reference)  |         | 1.00 (reference)          |         |
| Pre-existing T1D                                                                    | 42/450                 | 2.00 (1.39, 2.89) | <0.001  | 1.59 (1.09, 2.32)         | 0.02    |
| Pre-existing T2D                                                                    | 413/6,895              | 1.34 (1.20, 1.50) | <0.001  | 1.36 (1.21, 1.54)         | <0.001  |
| GDM with medications                                                                | 419/8,614              | 1.18 (1.06, 1.32) | 0.003   | 1.25 (1.12, 1.40)         | <0.001  |
| GDM without medications                                                             | 850/20,920             | 0.83 (0.77, 0.90) | <0.001  | 0.92 (0.85, 1.00)         | 0.04    |

\*adjusted for random sibling effect and birth year in the Cox regression models.

†adjusted for random sibling effect, birth year, maternal age at delivery, parity, education, household income, maternal race/ethnicity, history of comorbidity, history of maternal ADHD, and sex of the child in the Cox regression models.

# SUPPLEMENTARY DATA

**Supplementary Table 3.** Associations between maternal diabetes and risk of attention-deficit hyperactivity disorder (ADHD) in offspring after excluding mothers who used oral anti-diabetes medications only during pregnancy

|                                                             |                        | Bivariate*        |         | Multivariate<br>adjusted† |         |
|-------------------------------------------------------------|------------------------|-------------------|---------|---------------------------|---------|
| Maternal diabetes                                           | No. with<br>ADHD/Total | HR (95% CI)       | P value | HR (95% CI)               | P value |
| <i>Diabetes status with medication use during pregnancy</i> |                        |                   |         |                           |         |
| None                                                        | 15,469/295,304         | 1.00 (reference)  |         | 1.00 (reference)          |         |
| Pre-existing T1D                                            | 48/522                 | 2.01 (1.42, 2.84) | <0.001  | 1.59 (1.09, 2.32)         | 0.02    |
| Pre-existing T2D                                            | 432/6,777              | 1.43 (1.28, 1.60) | <0.001  | 1.49 (1.32, 1.67)         | <0.001  |
| GDM with medications                                        | 411/7,216              | 1.20 (1.42, 2.84) | <0.001  | 1.28 (1.14, 1.43)         | <0.001  |
| GDM without medications                                     | 940/20,920             | 0.84 (0.78, 0.90) | <0.001  | 0.93 (0.86, 1.00)         | 0.06    |

\*adjusted for random sibling effect and birth year in the Cox regression models.

†adjusted for random sibling effect, birth year, maternal age at delivery, parity, education, household income, maternal race/ethnicity, history of comorbidity, history of maternal ADHD, and sex of the child in the Cox regression models.

SUPPLEMENTARY DATA

**Supplementary Figure 1.** Mean HbA1c for a Subset of the Study Cohort with HbA1c data

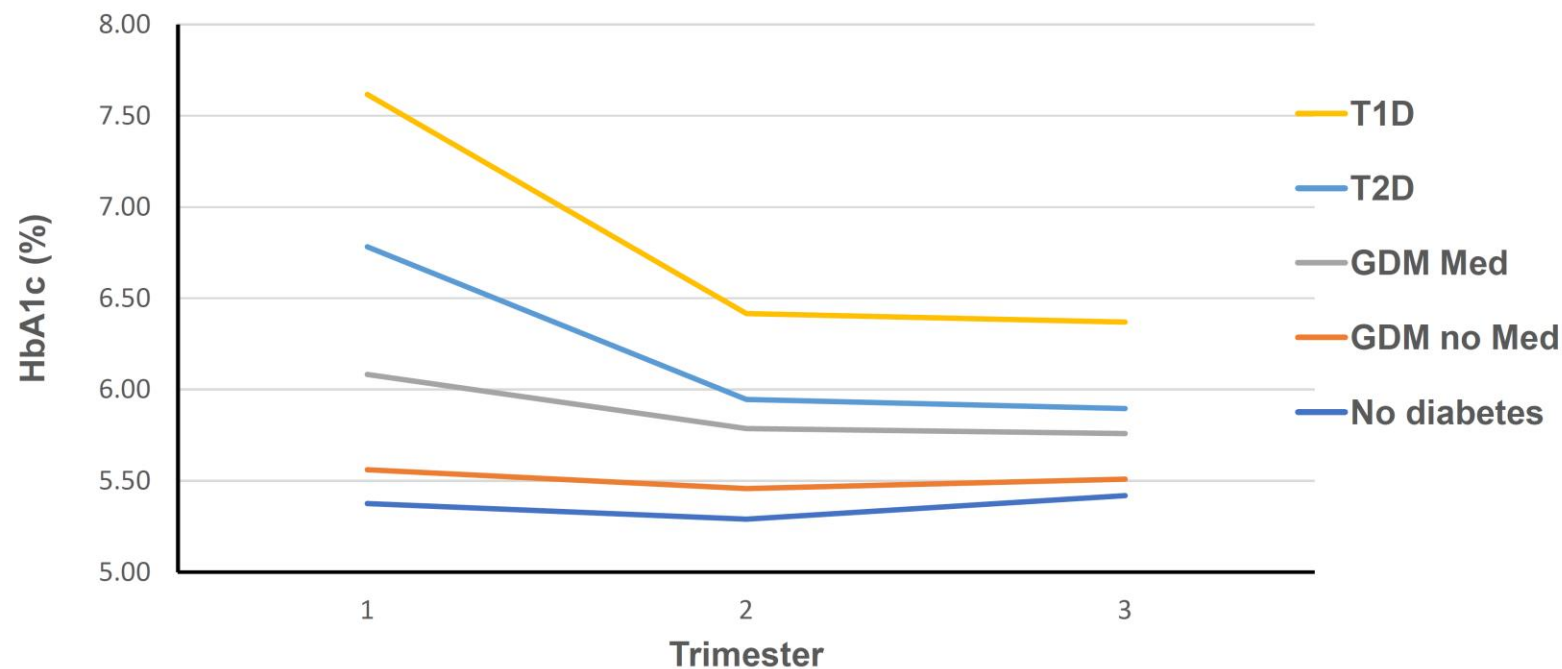

| Sample size | Any Trimester (% of cohort) | Trimester 1 | Trimester 2 | Trimester 3 |
|-------------|-----------------------------|-------------|-------------|-------------|
| T1D         | 477 (91.4%)                 | 394         | 293         | 294         |
| T2D         | 5,080 (65.0%)               | 3,318       | 1,845       | 2,301       |
| GDM Med     | 5,423 (63.0%)               | 1,714       | 1,484       | 3,268       |
| GDM no Med  | 7,581 (36.2%)               | 1,736       | 1,425       | 5,125       |
| No diabetes | 15,311 (5.2%)               | 9,385       | 2,567       | 3,918       |
